# Supplementary material for: Compartmental modeling of whole-body vitamin A kinetics in unsupplemented and vitamin A-retinoic acid-supplemented neonatal rats
Source: PubMed Central journal article supplement (PMC4109768; doi:10.1194/jlr.m050518), 2014-08
Supplement: supp_M050518_jlr.M050518-3.pdf [file supp_M050518_jlr.M050518-3.pdf]

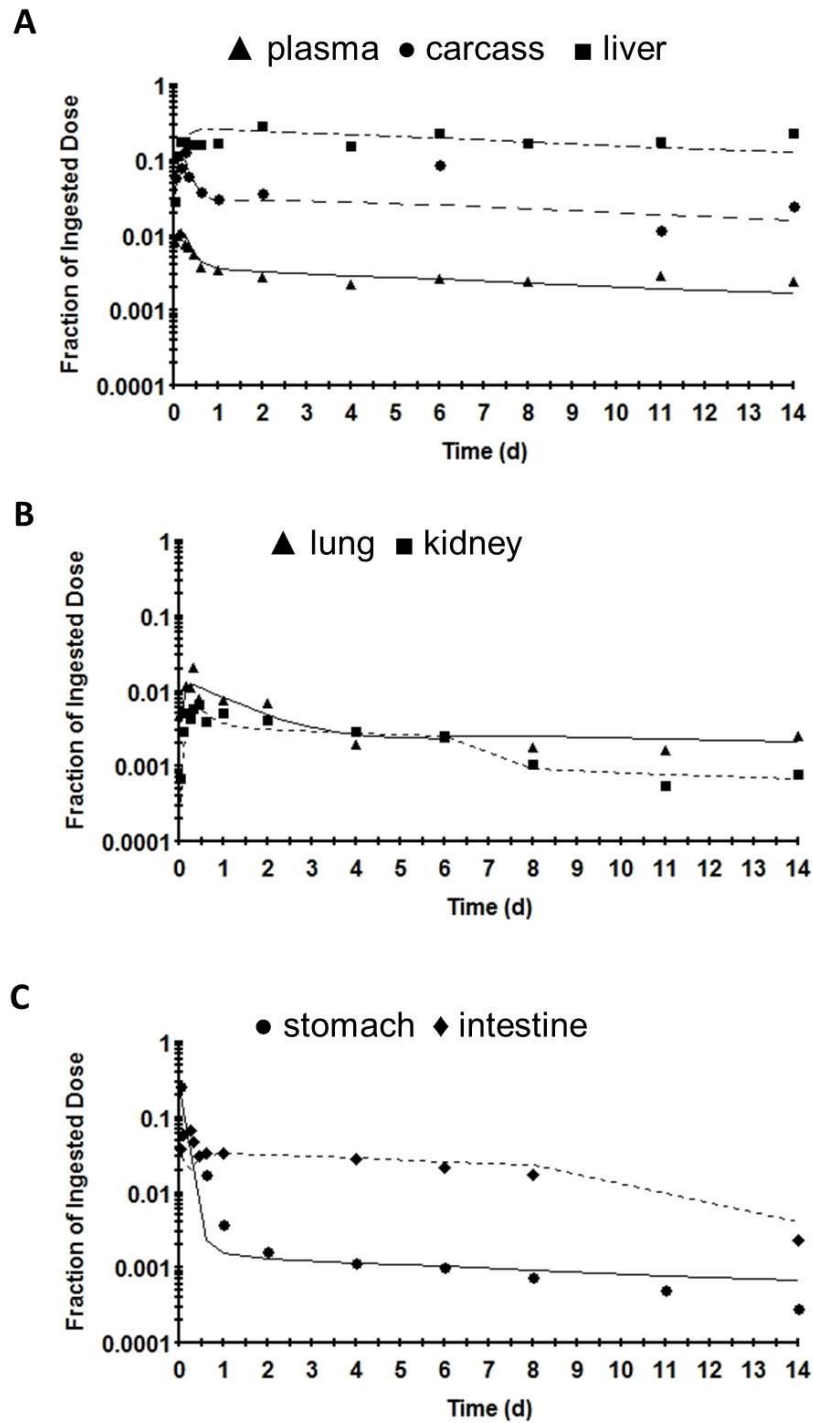

Figure S3. Mean observed (symbols) and model 2-predicted (lines) fraction of administered dose in plasma, liver, and carcass (A); lung and kidney (B); and stomach and intestine (C) vs. time (d) after administration of [ $^3\text{H}$ ]retinol in VARA to neonatal rats. Each point represents the mean of  $n=3$  pups.
